# Supplementary material for: Analysis of Primary Cilium Expression and Hedgehog Pathway Activation in Mesothelioma Throws Back Its Complex Biology
Source: MDPI journal article supplement (doi:10.3390/cancers14215216), 2022-10-25
Supplement: s1 [file s1]

| Cell line | Age | Gender | Diagnosis                         | Chemotherapy<br>(platinum and anti-folate) |
|-----------|-----|--------|-----------------------------------|--------------------------------------------|
| MMP1      | 77  | Male   | Poorly differentiated epithelioid | Yes                                        |
| MMP4      | 72  | Male   | Epithelioid                       | No                                         |
| MMP14     | 79  | Male   | Biphasic                          | Yes                                        |
| MMP18     | 72  | Female | Early stage epithelioid           | Yes                                        |
| MMP21     | 74  | Male   | Early stage epithelioid           | Yes                                        |
| MMP23     | 67  | Female | Epithelioid                       | Yes                                        |
| MMP32     | 68  | Male   | Epithelioid                       | Yes                                        |
| MMP43     | 69  | Male   | Epithelioid                       | Yes                                        |
| HMC7      | 16  | Male   | Mesothelial hyperplasia           | n.a.                                       |
| HMC12     | 61  | Male   | Mesothelial hyperplasia           | n.a.                                       |
| HMC13     | 73  | Male   | Pleuritis                         | n.a.                                       |

Supplementary Table S1. Clinical information about mesothelial and mesothelioma patient-derived cell lines. n.a.= not applicable

| n° of patients | Gender                       | Diagnosis                                                                            | Stage at diagnosis                                    | Treatment                                 | Overall Survival         |
|----------------|------------------------------|--------------------------------------------------------------------------------------|-------------------------------------------------------|-------------------------------------------|--------------------------|
| 18             | Female (n=2);<br>Male (n=17) | 16 epithelioids<br>4 biphasic, 1<br>desmoplastic                                     | 14 patients: IB<br>2 patients: II<br>2 patients: IIIA | CHT (platinum<br>plus pemetrexed=<br>= 17 | 21,952 ± 2,246<br>months |
| 4              | Male                         | Non-malignant<br>mesothelial<br>reactive<br>hyperplasia<br>(n=2); pleuritis<br>(n=2) | n.a.                                                  | n.a.                                      |                          |

Supplementary Table S2. Clinical information about non-malignant and mesothelioma FFPE tissues.  
CHT: Chemotherapy; n.a.: not applicable

| Pathway Name                                     | Average Number of Perturbations |
|--------------------------------------------------|---------------------------------|
| Nephrin/Neph1 signaling in the kidney podocyte   | 18                              |
| Ephrin A reverse signaling                       | 13                              |
| Syndecan-1-mediated signaling events             | 11                              |
| Signaling events mediated by the Hedgehog family | 10                              |
| IL4-mediated signaling events                    | 10                              |

Supplementary Table S3. Top five pathways deregulated in mesothelioma.

[https://gdac.broadinstitute.org/runs/analyses\\_2014\\_10\\_17/reports/cancer/MESO-TP/Pathway Paradigm RNASeq And Copy Number/nozzle.html](https://gdac.broadinstitute.org/runs/analyses_2014_10_17/reports/cancer/MESO-TP/Pathway%20Paradigm%20RNASeq%20And%20Copy%20Number/nozzle.html)

| Cell line | <i>GLI1</i> Fold induction $\pm$ St. Dev. | <i>PTCH1</i> Fold induction $\pm$ St. Dev. | <i>c-MYC</i> Fold induction $\pm$ St. Dev. |
|-----------|-------------------------------------------|--------------------------------------------|--------------------------------------------|
| HMC7      | 1                                         | 1                                          | 1                                          |
| LP-9      | 0.75 $\pm$ 0.05                           | 1.16 $\pm$ 0.86                            | 0.88 $\pm$ 0.22                            |
| MMP1      | 1.85 $\pm$ 0.33                           | 3.81 $\pm$ 0.97                            | 1.65 $\pm$ 0.18                            |
| MMP4      | 5.73 $\pm$ 1.92                           | 3.73 $\pm$ 0.89                            | 2.19 $\pm$ 0.43                            |
| MSTO-211H | 7.96 $\pm$ 1.56                           | 4.24 $\pm$ 0.98                            | 3.04 $\pm$ 0.57                            |
| MMP18     | 1.96 $\pm$ 0.70                           | 0.84 $\pm$ 0.49                            | 0.96 $\pm$ 0.1                             |
| MMP21     | 0.94 $\pm$ 0.17                           | 1.92 $\pm$ 0.79                            | 0.69 $\pm$ 0.09                            |
| MMP23     | 2.87 $\pm$ 0.86                           | 2.25 $\pm$ 0.6                             | 1.1 $\pm$ 0.2                              |
| NCI-H2052 | 1.51 $\pm$ 0.53                           | 1.18 $\pm$ 0.11                            | 2.01 $\pm$ 0.36                            |

Supplementary Table S4. qRT-PCR analysis of *GLI1*, *PTCH1* and *c-MYC* genes. Relative fold induction of the analyzed genes vs HMC7 normal mesothelial cells. St. Dev.= Standard Deviation.

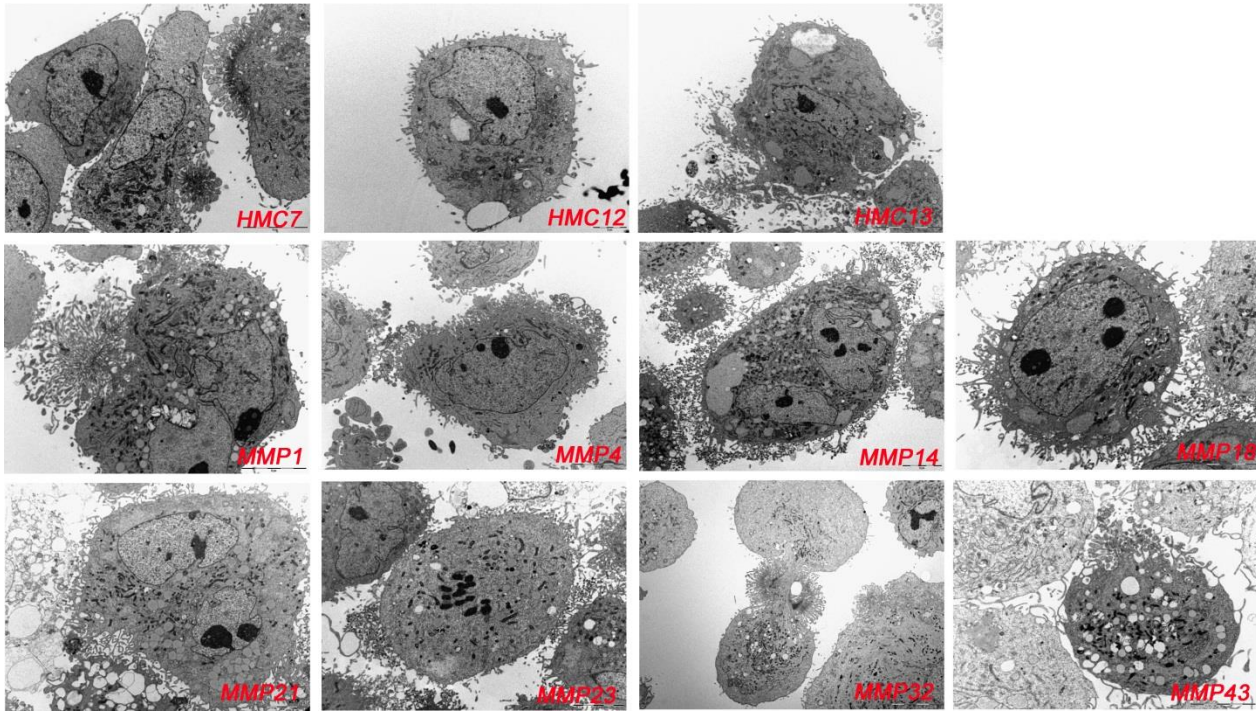

Supplementary Figure S1. TEM images of primary mesothelioma cells. The mesothelial cells are covered by abundant, long, frequently branching microvilli (original magnification 3500x).
